# Supplementary material for: HPLC/MS Phytochemical Profiling with Antioxidant Activities of Echium humile Desf. Extracts: ADMET Prediction and Computational Study Targeting Human Peroxiredoxin 5 Receptor
Source: MDPI journal article supplement (doi:10.3390/agronomy11112165), 2021-10-27
Supplement: s1 [file s1]

**Table S1.** Major phytochemicals with the lowest binding energies and their interaction residues with human peroxiredoxin 5.

| Compounds<br>Receptor vs. Targets | Interaction type                                                                                      | Interacting Residues (1HD2)                                                                                                                                                                                               | Binding<br>Energy<br>(kcal/mol) |
|-----------------------------------|-------------------------------------------------------------------------------------------------------|---------------------------------------------------------------------------------------------------------------------------------------------------------------------------------------------------------------------------|---------------------------------|
| 1,3-di-O-<br>caffeoyquinic acid   | van der Waals<br>H bond<br>C-H bond<br>Unfavorable Donor-<br>Donor<br>Pi-Cation                       | Pro40, Gly41, Ala42, Gly46, Val80,<br>Ile119, Phe120, Asp145, Thr147,<br>Gly148, Leu149<br>Thr44 (2.07) (2.97), Cys47 (2.55),<br>Arg127 (2.51)<br>Pro45 (3.34) (3.62)<br>Asn76 (1.36)<br>Arg124 (3.83)                    | -6.6                            |
| <i>p</i> -Coumaric acid           | van der Waals<br>C-H bond<br>Pi-Cation<br>Pi-Sulfur<br>Pi-Alkyl                                       | Pro45, Gly46, Leu116, Phe120,<br>Thr147<br>Thr44 (2.76), Cys47 (3.25), Arg127<br>(2.33)<br>Arg127 (4.22)<br>Cys47 (5.27)<br>Pro40 (5.02)                                                                                  | -4.4                            |
| <i>Trans</i> -Ferulic acid        | van der Waals<br>H bond<br>C-H bond<br>Unfavorable Donor-<br>Donor Pi-Cation<br>Pi-Sulfur<br>Pi-Alkyl | Thr44, Pro45, Leu116, Leu149,<br>Phe120<br>Gly46 (2.37) (2.56), Cys47 (2.41)<br>Thr147 (3.06)<br>Arg127 (1.62)<br>Arg127 (4.21)<br>Arg127 (5.24)<br>Pro40 (5.07)                                                          | -4.7                            |
| Naringin                          | van der Waals<br>H bond<br>C-H bond<br>Unfavorable Acceptor-<br>Acceptor<br>Alkyl/Pi-Alkyl            | Gly41, Thr44, Gly46, Leu149,<br>Phe120, Arg127<br>Ala42 (1.97), Phe43 (2.57), Asn76<br>(2.15), Arg124 (2.11) (2.36), Thr147<br>(2.60) Phe43 (3.13)<br>Phe43 (2.86)<br>Pro45 (4.80), Val80 (3.98) (4.53),<br>Ile119 (4.87) | -7.0                            |
| Rosmarinic acid                   | van der Waals<br>H bond<br>C-H bond<br>Unfavorable Donor-<br>Donor<br>Pi-Cation<br>Pi-Alkyl           | Gly41, Ala42, Thr44, Pro45, Gly46,<br>Val80, Leu116, Ile119, Phe120<br>Cys47 (2.76), Arg127 (2.37)<br>Thr147 (3.01)<br>Asn76 (1.11).<br>Arg124 (4.15).<br>Pro40 (5.27)                                                    | -6.6                            |
| Rutin                             | van der Waals<br>H bond<br>C-H bond<br>Unfavorable Donor-<br>Donor<br>Pi-Sigma                        | Ala42, Phe43, Thr44, Pro45,<br>Phe120, Val75, Val80.<br>Asp77 (2.38), Arg124 (1.89).<br>Asn76 (3.42).<br>Asn122 (2.39).<br>Ile119 (3.83).                                                                                 | -6.5                            |
| Salviolinic acid                  | van der Waals<br>H bond                                                                               | Pro40, Gly41, Ala42, Asn76, Val80,<br>Ile119, Leu149.                                                                                                                                                                     | -6.3                            |

|                                        |                                                                                                    |           |                                                                                                                                              |      |
|----------------------------------------|----------------------------------------------------------------------------------------------------|-----------|----------------------------------------------------------------------------------------------------------------------------------------------|------|
|                                        | Unfavorable Donor: Pi-Cation<br>Pi-Pi T shaped                                                     | Donor-    | Phe43 (3.01), Thr44 (2.92), Gly46 (2.37), Cys47 (2.79), Thr147 (2.62). Arg127 (1.30). Arg124 (3.73). Phe120 (5.42). Pi-Alkyl: Po45 (5.43).   |      |
| 4,5-di-O-caffeoyquinic acid            | van der Waals<br>H bond<br>C-H bond<br>Pi-Pi T shaped                                              |           | Pro40, Gly41, Gly46, Cys47, Leu116, Leu112, Ile119, Arg127, Gly146, Thr147 Asp145 (2.57) (3.58) Pro45 (3.55), Thr44 (3.58) Phe120 (5.09)     | -5.5 |
| Apegenin-7-O-glucoside                 | van der Waals<br>H bond<br>Pi-Pi stacked<br>Pi-Alkyl                                               |           | Ala42, Thr44, Pro45, Val75, Ile119 Asp73 (2.76), Asn76 (2.43), Asn122 (2.06), Arg124 (2.56) (2.96). Phe120 (5.35), Phe43 (5.94) Val80 (5.39) | -6.5 |
| Quercetrin (quercetin-3-O-rhamonoside) | van der Waals:<br>H bond:<br>Unfavorable Acceptor-<br>Acceptor/Donor-Dnor<br>Alkyl/Pi-Alkyl:       | Acceptor- | Gly41, Ala42, Thr44, Pro45, Ile119 Phe43 (3.04), Asn76 (2.48), Arg124 (2.54) Phe120 (2.70), Arg124 (5.36) Phe43 (4.61), Val80 (3.97)         | -6.3 |
| Cirsiliol                              | van der Waals<br>H bond<br>Unfavorable Donor-<br>Donor<br>Pi-Cation<br>Pi-Pi T shaped<br>Pi-Alkyl: | Donor-    | Gly41, Ala42, Phe43, Thr44, Pro45, Val80. Asn76 (1.95) (2.52). Arg124 (1.07). Arg124 (4.01). Phe120 (4.89). Ile119 (5.04)                    | -5.5 |

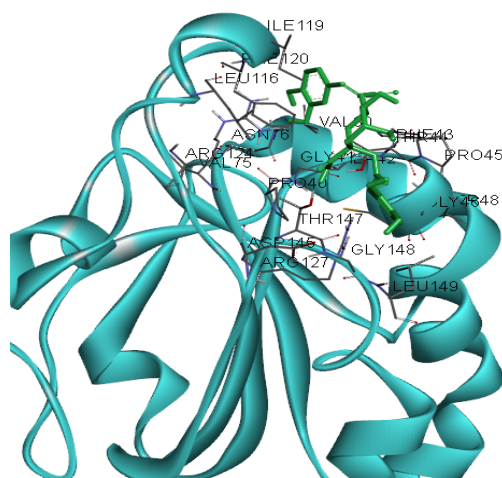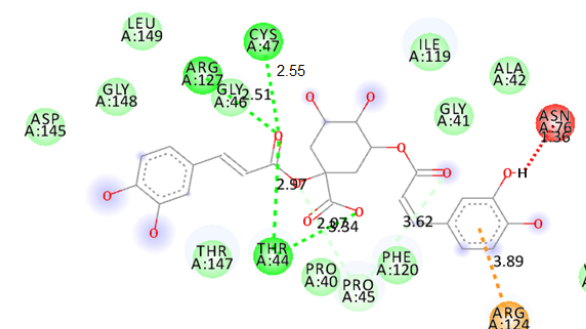

#### Interactions

- van der Waals
- Conventional Hydrogen Bond
- Carbon Hydrogen Bond
- Unfavorable Donor-Donor
- Pi-Cation

1,3-di-O-caffeoyquinic acid-1HD2

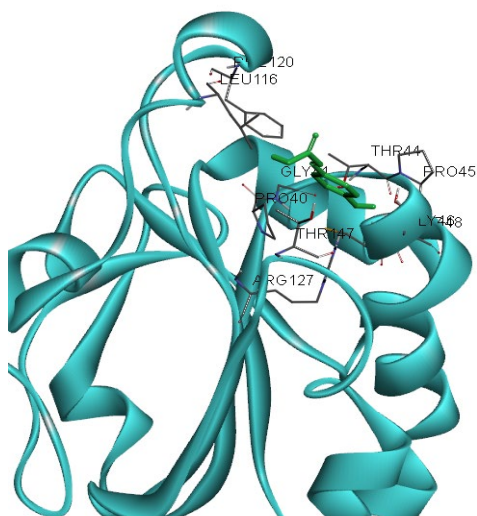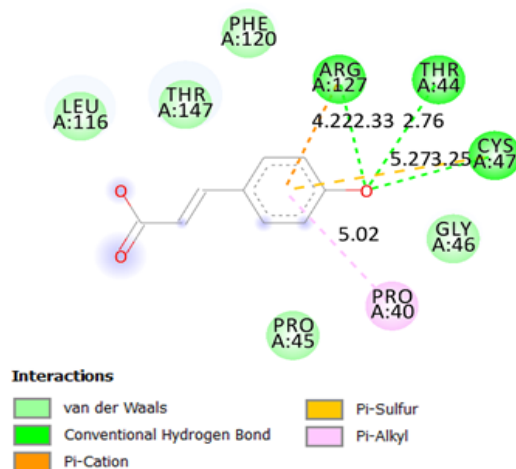

**p-Coumaric acid-1HD2**

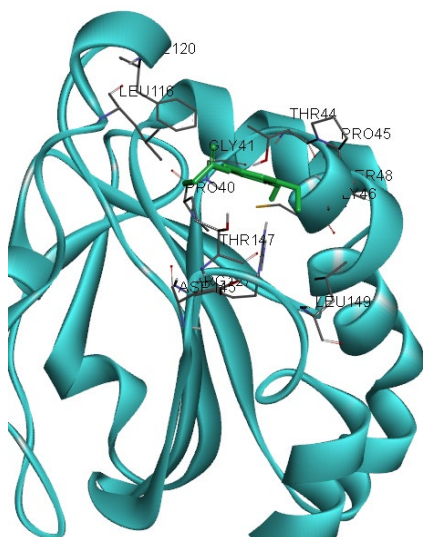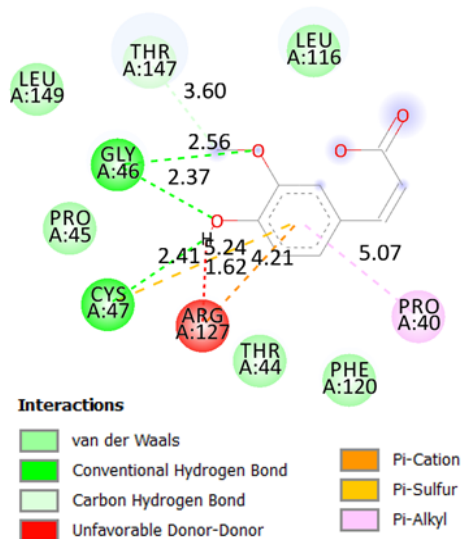

**Trans-Ferulic acid-1HD2**

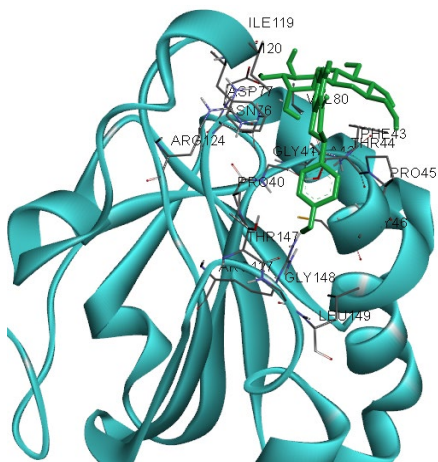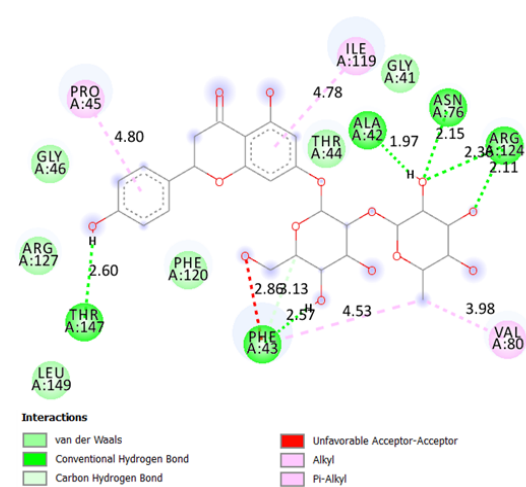

## Naringin-1HD2

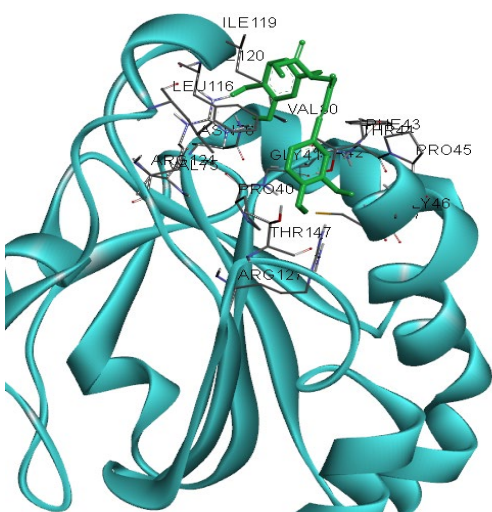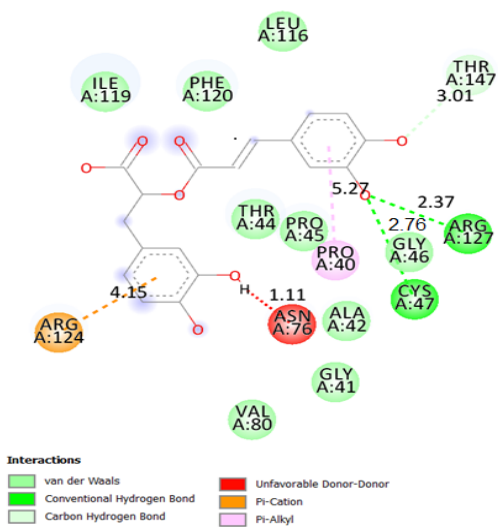

### Rosmarinic acid-1HD2

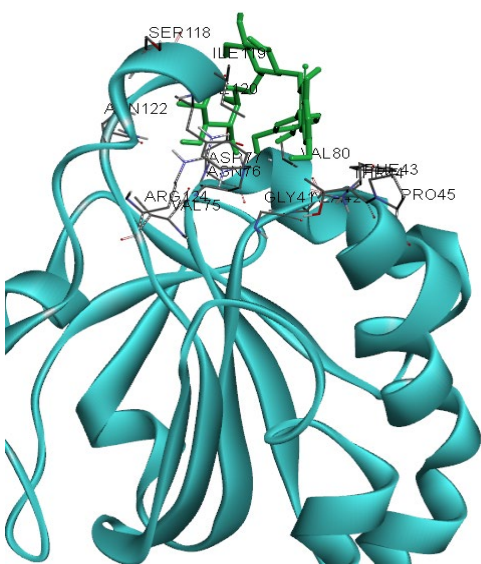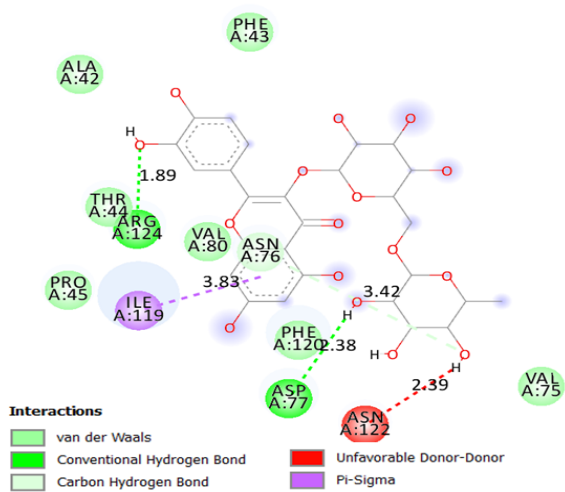

## Rutin-1HD2

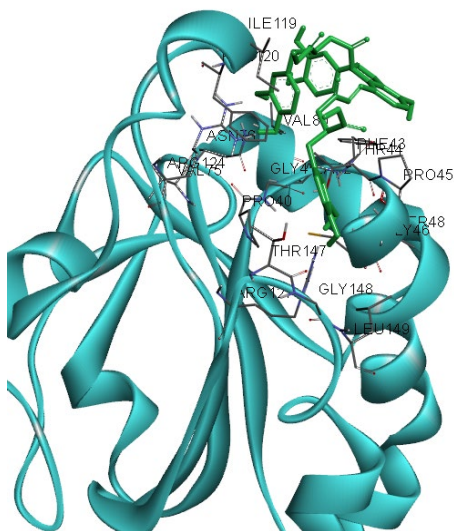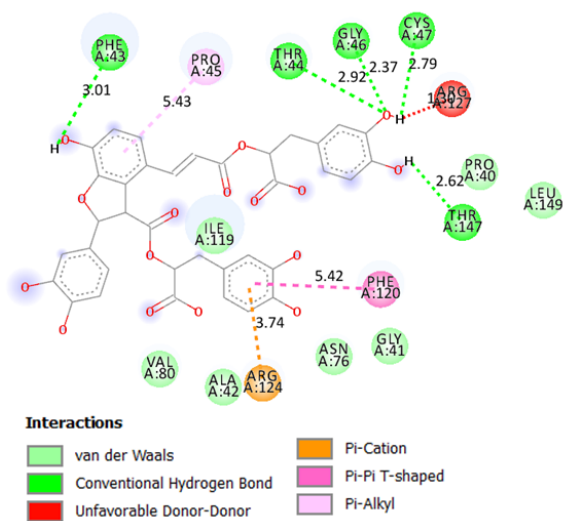

Salviolinic acid-1HD2

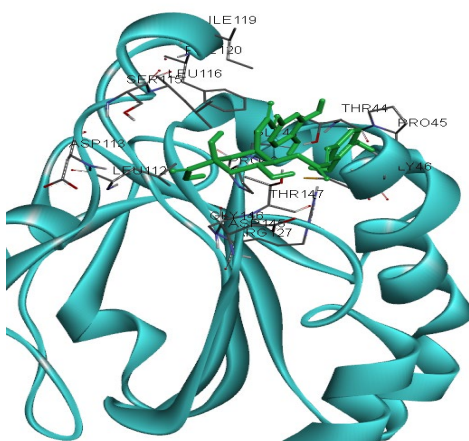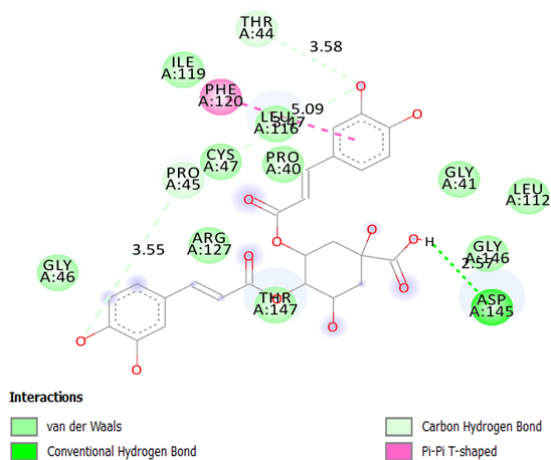

4,5-di-O-caffeoyquinic acid-1HD2



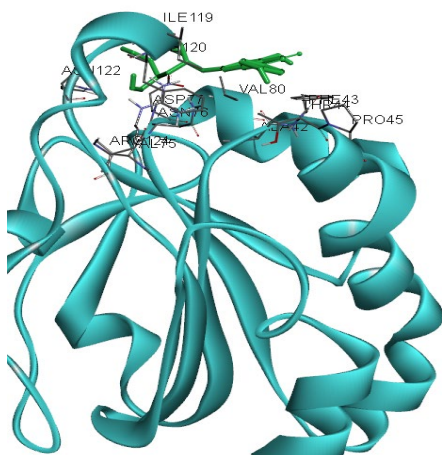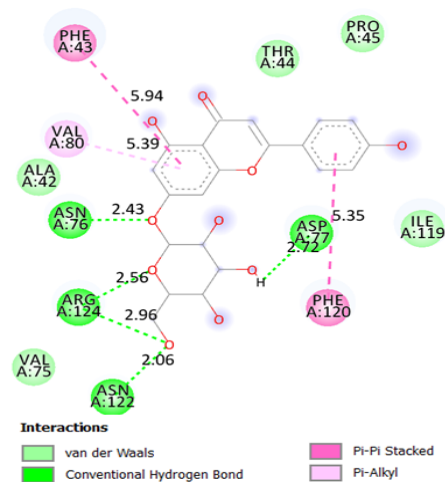

**Apeginin-7-O-glucoside-1HD2**

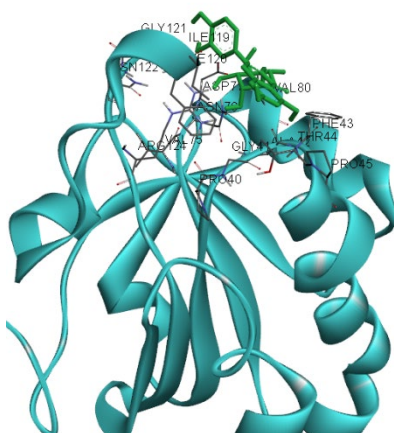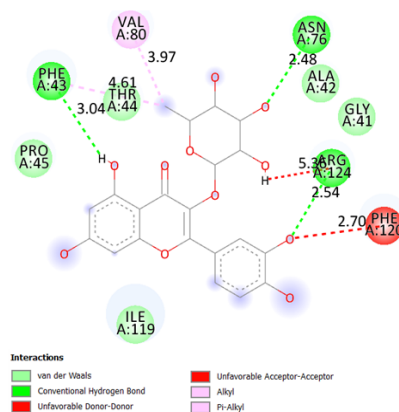

**Quercetrin-1HD2**

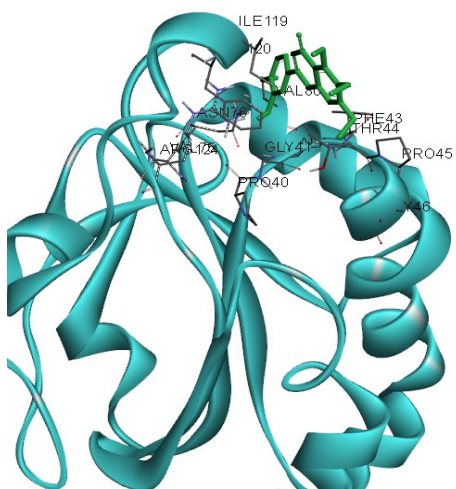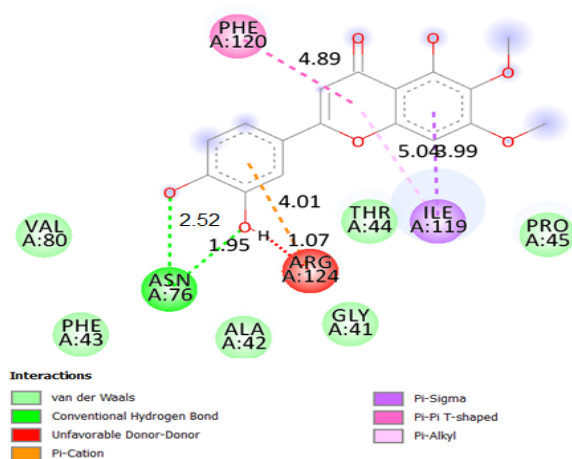

**Cirsiol-1HD2**

**Figure S1.** Interactions of human Peroxiredoxin 5 receptor (PDB: 1HD2) with the selected major phytochemicals of *E. humile* Desf. ethyl extract with the lowest binding energies.

**A**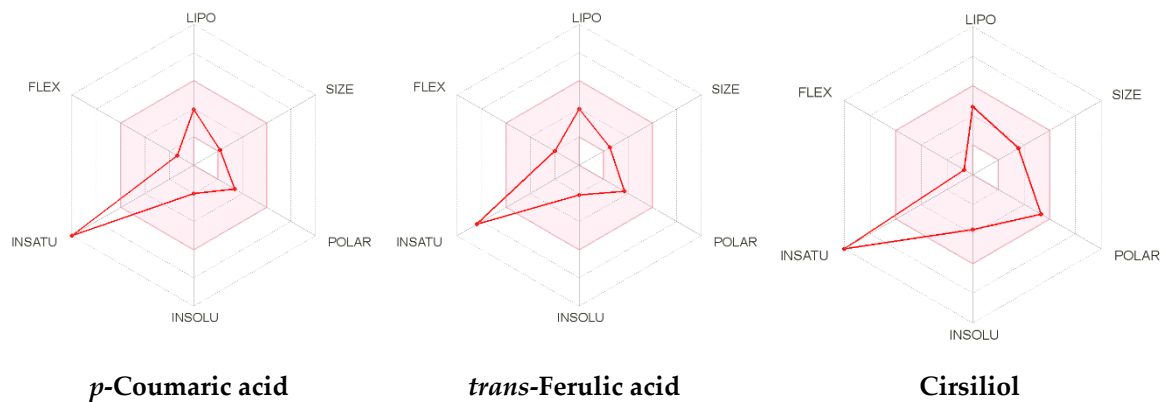**B**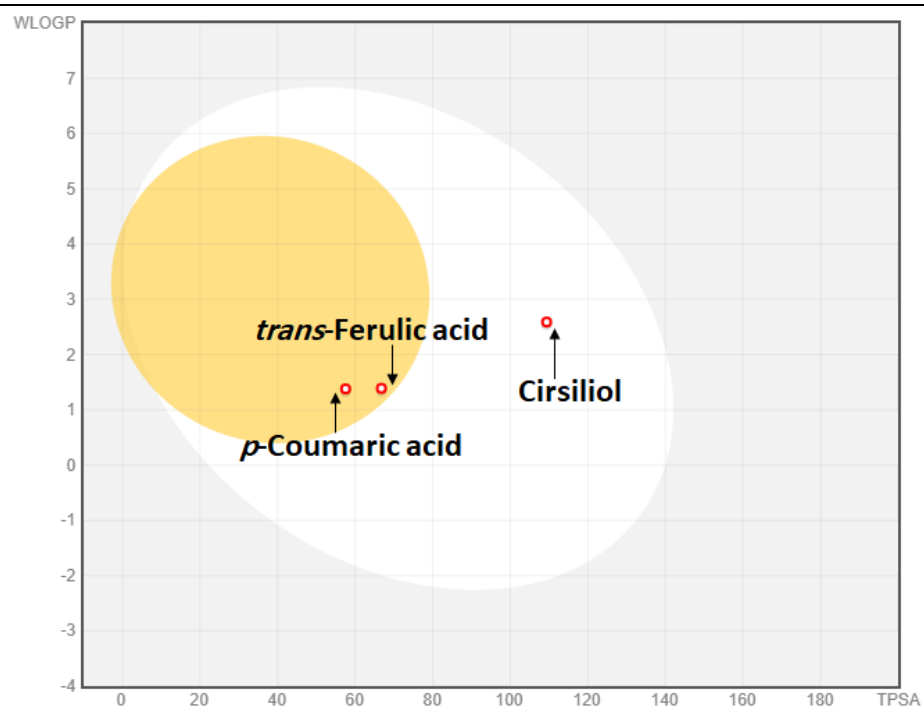

**Figure S2.** Bioavailability radar (A) and BOILED-Egg model (B) of the major constituents.
